# Supplementary material for: Sex-Specific Outcomes in Patients with Acute Coronary Syndrome
Source: PubMed Central journal article supplement (PMC7408894; doi:10.3390/jcm9072124), 2020-07-06
Supplement: jcm-09-02124-s001.pdf [file jcm-09-02124-s001.pdf]

## Supplementary Material

**Table S1.** ICD and OPS codes used for the analyses.

|                      | ICD/OPS code     |
|----------------------|------------------|
| ACS                  | I20.0, I21, I22  |
| UAP                  | I20.0            |
| MI                   | I21, I22         |
| STEMI                | I21.0-21.3       |
| NSTEMI               | I21.4            |
| Hypertension         | I10              |
| Dyslipidemia         | E78              |
| Diabetes             | E10, E11         |
| PAD                  | I70.2            |
| Prior stroke         | I63, I64         |
| Atrial fibrillation  | I48              |
| COPD                 | J44              |
| Renal insufficiency  | N18, N19         |
| Prior CABG           | Z95.1            |
| Coronary angiography | OPS 1-275        |
| In-hospital PCI      | OPS 8-837        |
| In-hospital CABG     | OPS 5-361, 5-362 |

**Table S2.** Characteristics for females and males according to type of stenting comparing bare-metal-stents (BMS) and drug-eluting-stents (DES).

|                     | Females         |                 | Males           |                 |
|---------------------|-----------------|-----------------|-----------------|-----------------|
|                     | BMS             | DES             | BMS             | DES             |
| N available         | 199,795         | 229,814         | 456,149         | 580,244         |
| Age, years          | 72.2 ± 11.4     | 69.9 ± 11.7     | 65.3 ± 12.2     | 64.3 ± 12.0     |
| Hypertension        | 120,277 (60.2%) | 143,713 (62.5%) | 258,315 (56.6%) | 350,230 (60.4%) |
| Dyslipidemia        | 92,996 (46.6%)  | 119,871 (52.2%) | 226,044 (49.6%) | 319,638 (55.1%) |
| Diabetes            | 56,048 (28.1%)  | 74,234 (32.3%)  | 98,054 (21.5%)  | 152,206 (26.2%) |
| PAD                 | 7368 (3.7%)     | 10,099 (4.4%)   | 19,151 (4.2%)   | 26,962 (4.7%)   |
| Prior Stroke        | 1862 (0.9%)     | 1723 (0.8%)     | 2827 (0.6%)     | 2723 (0.5%)     |
| Atrial Fibrillation | 34,258 (17.2%)  | 28,883 (12.6%)  | 60,840 (13.3%)  | 59,869 (10.3%)  |
| COPD                | 11,019 (5.5%)   | 12,972 (5.6%)   | 27,035 (5.9%)   | 30,637 (5.3%)   |
| Renal Insufficiency | 36,715 (18.4%)  | 44,148 (19.2%)  | 67,409 (14.8%)  | 86,905 (15.0%)  |

|                                   |                 |                 |                 |                 |
|-----------------------------------|-----------------|-----------------|-----------------|-----------------|
| Prior CABG                        | 5,904 (3.0%)    | 8637 (3.8%)     | 22,277 (4.9%)   | 34,392 (5.9%)   |
| <i>During Hospital Stay</i>       |                 |                 |                 |                 |
| Mean Hospital Stay Duration, days | 8.0 ± 7.6       | 7.2 ± 6.8       | 7.2 ± 7.7       | 6.4 ± 6.2       |
| Coronary Angiography              | 194,875 (97.5%) | 224,763 (97.8%) | 444,679 (97.5%) | 567,598 (97.8%) |
| In-hospital PCI                   | 199,795 (100%)  | 229,814 (100%)  | 456,149 (100%)  | 580,244 (100%)  |
| In-hospital CABG                  | 812 (0.4%)      | 642 (0.3%)      | 2348 (0.5%)     | 1825 (0.3%)     |
| In-hospital Mortality             | 12,457 (6.2%)   | 9359 (4.1%)     | 20,188 (4.4%)   | 17,001 (2.9%)   |

**Table S3.** Characteristics of female patients with ACS displayed per year.

|                                   | 2005           | 2006           | 2007           | 2008           | 2009           |
|-----------------------------------|----------------|----------------|----------------|----------------|----------------|
| N available                       | 140,755        | 134,914        | 135,270        | 128,374        | 122,340        |
| Age, years                        | 72.7 ± 11.9    | 72.8 ± 12.0    | 72.9 ± 12.1    | 73.1 ± 12.0    | 73.2 ± 12.2    |
| Hypertension                      | 80,346 (57.1%) | 77,540 (57.5%) | 76,326 (56.4%) | 72,093 (56.2%) | 70,258 (57.4%) |
| Dyslipidemia                      | 50,992 (36.2%) | 49,555 (36.7%) | 49,705 (36.7%) | 47,882 (37.3%) | 47,305 (38.7%) |
| Diabetes                          | 40,858 (29.0%) | 39,415 (29.2%) | 40,370 (29.8%) | 38,265 (29.8%) | 36,354 (29.7%) |
| PAD                               | 4757 (3.4%)    | 4125 (3.1%)    | 4641 (3.4%)    | 4876 (3.8%)    | 4583 (3.7%)    |
| Prior Stroke                      | 1656 (1.2%)    | 1511 (1.2%)    | 1473 (1.1%)    | 1337 (1.0%)    | 1172 (1.0%)    |
| Atrial Fibrillation               | 24,353 (17.3%) | 23,745 (17.6%) | 24,493 (18.1%) | 23,756 (18.5%) | 23,305 (19.0%) |
| COPD                              | 8376 (6.0%)    | 7968 (5.9%)    | 8138 (6.0%)    | 7889 (6.1%)    | 7873 (6.4%)    |
| Renal Insufficiency               | 21,728 (15.4%) | 21,922 (16.2%) | 23,845 (17.6%) | 24,824 (19.3%) | 25,824 (21.1%) |
| Prior CABG                        | 5845 (4.2%)    | 5875 (4.4%)    | 5957 (4.4%)    | 5771 (4.5%)    | 5669 (4.6%)    |
| <i>During Hospital Stay</i>       |                |                |                |                |                |
| Mean Hospital Stay Duration, days | 8.4 ± 8.0      | 8.3 ± 8.0      | 8.1 ± 8.0      | 7.9 ± 7.8      | 7.7 ± 7.9      |
| Coronary Angiography              | 63,248 (44.9%) | 63,910 (47.3%) | 67,088 (49.6%) | 66,191 (51.6%) | 66,770 (54.6%) |
| In-hospital PCI                   | 37,193 (26.4%) | 38,757 (28.7%) | 40,733 (30.1%) | 41,441 (32.3%) | 40,745 (33.3%) |
| In-hospital CABG                  | 4588 (3.3%)    | 4440 (3.3%)    | 4302 (3.2%)    | 4057 (3.2%)    | 3823 (3.1%)    |
| In-hospital Mortality             | 11,582 (8.2%)  | 11,056 (8.2%)  | 11,217 (8.3%)  | 10,815 (8.4%)  | 10,332 (8.4%)  |

|                     | 2010           | 2011           | 2012           | 2013           | 2014           | 2015           |
|---------------------|----------------|----------------|----------------|----------------|----------------|----------------|
| N available         | 123,051        | 120,722        | 120,803        | 116,524        | 115,000        | 108,292        |
| Age, years          | 73.1 ± 12.3    | 73.4 ± 12.2    | 73.2 ± 12.4    | 73.3 ± 12.4    | 73.3 ± 12.4    | 73.2 ± 12.4    |
| Hypertension        | 71,083 (57.8%) | 70,740 (58.6%) | 71,061 (58.8%) | 68,430 (58.7%) | 67,469 (58.7%) | 63,780 (58.9%) |
| Dyslipidemia        | 49,214 (40.0%) | 49,243 (40.8%) | 50,018 (41.4%) | 47,861 (41.1%) | 47,742 (41.5%) | 45,576 (42.1%) |
| Diabetes            | 36,908 (30.0%) | 36,813 (30.5%) | 36,137 (29.9%) | 35,083 (30.1%) | 34,202 (29.7%) | 32,068 (29.6%) |
| PAD                 | 4922 (4.0%)    | 4962 (4.1%)    | 5034 (4.2%)    | 5109 (4.4%)    | 5352 (4.7%)    | 4929 (4.6%)    |
| Prior Stroke        | 1136 (0.9%)    | 1039 (0.9%)    | 1118 (0.9%)    | 1064 (0.9%)    | 1029 (0.9%)    | 964 (0.9%)     |
| Atrial Fibrillation | 24,043 (19.5%) | 24,636 (20.4%) | 24,764 (20.5%) | 24,228 (20.8%) | 24,231 (21.1%) | 22,832 (21.1%) |

|                                   |                |                |                |                |                |                |
|-----------------------------------|----------------|----------------|----------------|----------------|----------------|----------------|
| COPD                              | 8198 (6.7%)    | 8323 (6.9%)    | 8483 (7.0%)    | 8459 (7.3%)    | 8344 (7.3%)    | 8087 (7.5%)    |
| Renal Insufficiency               | 26,013 (21.1%) | 25,855 (21.4%) | 26,668 (22.1%) | 27,225 (23.4%) | 27,730 (24.1%) | 25,858 (23.9%) |
| Prior CABG                        | 6094 (5.0%)    | 5736 (4.8%)    | 5810 (4.8%)    | 5551 (4.8%)    | 5532 (4.8%)    | 5186 (4.8%)    |
| <i>During Hospital Stay</i>       |                |                |                |                |                |                |
| Mean Hospital Stay Duration, days | 7.5 ± 7.7      | 7.5 ± 7.7      | 7.4 ± 7.8      | 7.2 ± 7.5      | 7.1 ± 7.4      | 6.8 ± 7.0      |
| Coronary Angiography              | 70,234 (57.1%) | 70,727 (58.6%) | 72,111 (59.7%) | 71,491 (61.4%) | 72,843 (63.3%) | 69,879 (64.6%) |
| In-hospital PCI                   | 43,295 (35.2%) | 44,782 (37.1%) | 45,677 (37.8%) | 45,959 (39.4%) | 47,563 (41.4%) | 46,276 (42.7%) |
| In-hospital CABG                  | 3902 (3.2%)    | 3743 (3.1%)    | 3824 (3.2%)    | 3816 (3.3%)    | 3577 (3.1%)    | 3336 (3.1%)    |
| In-hospital Mortality             | 9725 (7.9%)    | 9201 (7.6%)    | 9007 (7.5%)    | 8832 (7.6%)    | 8114 (7.1%)    | 7766 (7.2%)    |

**Table S4.** Characteristics of **male** patients with ACS displayed per year.

|                                   | 2005            | 2006            | 2007            | 2008            | 2009            |
|-----------------------------------|-----------------|-----------------|-----------------|-----------------|-----------------|
| N available                       | 232,444         | 225,849         | 229,699         | 221,053         | 215,025         |
| Age, years                        | 65.6 ± 12.2     | 65.7 ± 12.4     | 66.0 ± 12.4     | 66.3 ± 12.4     | 66.4 ± 12.5     |
| Hypertension                      | 130,153 (56.0%) | 126,688 (56.1%) | 127,636 (55.6%) | 122,561 (55.4%) | 121,724 (56.6%) |
| Dyslipidemia                      | 100,662 (43.3%) | 97,217 (43.1%)  | 99,627 (43.4%)  | 97,247 (44.0%)  | 97,218 (45.2%)  |
| Diabetes                          | 53,755 (23.1%)  | 53,571 (23.7%)  | 56,007 (24.4%)  | 55,083 (24.9%)  | 54,973 (25.6%)  |
| PAD                               | 11,218 (4.8%)   | 9612 (4.3%)     | 10,818 (4.7%)   | 11,434 (5.2%)   | 11,412 (5.3%)   |
| Prior Stroke                      | 1987 (0.9%)     | 1823 (0.8%)     | 1808 (0.8%)     | 1566 (0.7%)     | 11,217 (5.2%)   |
| Atrial Fibrillation               | 30,371 (13.1%)  | 30,267 (13.4%)  | 31,872 (13.9%)  | 31,878 (14.4%)  | 31,988 (14.9%)  |
| COPD                              | 16,840 (7.2%)   | 16,377 (7.3%)   | 16,190 (7.0%)   | 15,784 (7.1%)   | 15,977 (7.4%)   |
| Renal Insufficiency               | 33,080 (14.2%)  | 33,776 (15.0%)  | 36,393 (15.8%)  | 37,539 (17.0%)  | 39,443 (18.3%)  |
| Prior CABG                        | 18,183 (7.8%)   | 17,783 (7.9%)   | 18,056 (7.9%)   | 17,917 (8.1%)   | 17,903 (8.3%)   |
| <i>During Hospital Stay</i>       |                 |                 |                 |                 |                 |
| Mean Hospital Stay Duration, days | 7.4 ± 7.5       | 7.3 ± 7.6       | 7.2 ± 7.7       | 7.2 ± 7.7       | 7.0 ± 7.7       |
| Coronary Angiography              | 132,468 (57.0%) | 133,363 (59.1%) | 140,254 (61.1%) | 138,469 (62.6%) | 141,169 (65.7%) |
| In-hospital PCI                   | 89,074 (38.3%)  | 92,162 (40.8%)  | 97,023 (42.2%)  | 98,170 (44.4%)  | 97,932 (45.5%)  |
| In-hospital CABG                  | 13,115 (5.6%)   | 12,728 (5.6%)   | 12,745 (5.5%)   | 12,323 (5.6%)   | 12,183 (5.7%)   |
| In-hospital Mortality             | 12,450 (5.4%)   | 12,491 (5.5%)   | 12,654 (5.5%)   | 12,427 (5.6%)   | 12,506 (5.8%)   |

  

|              | 2010            | 2011            | 2012            | 2013            | 2014            | 2015            |
|--------------|-----------------|-----------------|-----------------|-----------------|-----------------|-----------------|
| N available  | 220,776         | 218,991         | 223,809         | 217,304         | 217,404         | 209,146         |
| Age, years   | 66.5 ± 12.6     | 66.7 ± 12.6     | 66.7 ± 12.7     | 66.8 ± 12.7     | 66.9 ± 12.7     | 67.0 ± 12.7     |
| Hypertension | 127,149 (57.6%) | 127,055 (58.0%) | 129,519 (57.9%) | 127,277 (58.6%) | 126,804 (58.3%) | 121,749 (58.2%) |
| Dyslipidemia | 103,209 (46.7%) | 103,693 (47.4%) | 107,483 (48.0%) | 103,651 (47.7%) | 104,844 (48.2%) | 101,255 (48.4%) |
| Diabetes     | 58,011 (26.3%)  | 58,480 (26.7%)  | 59,926 (26.8%)  | 58,933 (27.1%)  | 59,206 (27.2%)  | 57,241 (27.4%)  |
| PAD          | 11,875 (5.4%)   | 12,178 (5.6%)   | 12,388 (5.5%)   | 12,387 (5.7%)   | 12,736 (5.9%)   | 12,365 (5.9%)   |

|                                   |                 |                 |                 |                 |                 |                 |
|-----------------------------------|-----------------|-----------------|-----------------|-----------------|-----------------|-----------------|
| Prior Stroke                      | 1547 (0.7%)     | 1478 (0.7%)     | 1454 (0.6%)     | 1486 (0.7%)     | 1601 (0.7%)     | 1506 (0.7%)     |
| Atrial Fibrillation               | 33,916 (15.4%)  | 35,226 (16.1%)  | 37,139 (16.6%)  | 36,626 (16.9%)  | 37,670 (17.3%)  | 36,826 (17.6%)  |
| COPD                              | 16,615 (7.5%)   | 16,752 (7.6%)   | 16,764 (7.5%)   | 16,210 (7.5%)   | 16,297 (7.5%)   | 15,910 (7.6%)   |
| Renal Insufficiency               | 39,559 (17.9%)  | 39,256 (17.9%)  | 39,970 (17.9%)  | 40,633 (18.7%)  | 41,417 (19.1%)  | 39,229 (18.8%)  |
| Prior CABG                        | 18,809 (8.5%)   | 18,579 (8.5%)   | 18,861 (8.4%)   | 18,087 (8.3%)   | 18,230 (8.4%)   | 17,347 (8.3%)   |
| <i>During Hospital Stay</i>       |                 |                 |                 |                 |                 |                 |
| Mean Hospital Stay Duration, days | 6.8 ± 7.5       | 6.8 ± 7.5       | 6.8 ± 7.6       | 6.7 ± 7.5       | 6.6 ± 7.4       | 6.4 ± 6.9       |
| Coronary Angiography              | 148,780 (67.4%) | 151,294 (69.1%) | 156,223 (69.8%) | 154,941 (71.3%) | 157,796 (72.6%) | 153,857 (73.6%) |
| In-hospital PCI                   | 104,386 (47.3%) | 107,026 (48.9%) | 110,809 (49.5%) | 111,511 (51.3%) | 114,603 (52.7%) | 113,369 (54.2%) |
| In-hospital CABG                  | 12,426 (5.6%)   | 11,895 (5.4%)   | 12,302 (5.5%)   | 12,594 (5.8%)   | 12,483 (5.7%)   | 11,547 (5.5%)   |
| In-hospital Mortality             | 12,112 (5.5%)   | 11,687 (5.3%)   | 11,759 (5.3%)   | 11,837 (5.4%)   | 11,324 (5.2%)   | 11,064 (5.3%)   |

**Table S5.** Age-Adjusted incidence rates of ACS, NSTEMI, STEMI, UAP and in-hospital mortality cases per 1000 person-years ranging from 2005 to 2015 for females and males. The incidences for ACS, NSTEMI, STEMI, and UAP were calculated by using the age-specific distribution in Germany at the 31<sup>st</sup> December of each year, while incidences of in-hospital mortality were calculated by using the ACS distribution in Germany of each year.

| Year | Female |        |       |      |           | Male |        |       |      |           |
|------|--------|--------|-------|------|-----------|------|--------|-------|------|-----------|
|      | ACS    | NSTEMI | STEMI | UAP  | Mortality | ACS  | NSTEMI | STEMI | UAP  | Mortality |
| 2005 | 4.26   | 1.01   | 1.12  | 1.88 | 87.17     | 7.65 | 1.67   | 2.27  | 3.36 | 57.49     |
| 2006 | 4.03   | 1.12   | 1.00  | 1.71 | 84.99     | 7.30 | 1.88   | 2.08  | 3.05 | 58.43     |
| 2007 | 3.99   | 1.27   | 0.93  | 1.66 | 84.58     | 7.28 | 2.11   | 1.98  | 2.98 | 56.95     |
| 2008 | 3.74   | 1.30   | 0.85  | 1.48 | 84.53     | 6.87 | 2.20   | 1.80  | 2.70 | 56.94     |
| 2009 | 3.51   | 1.28   | 0.76  | 1.38 | 83.91     | 6.54 | 2.17   | 1.67  | 2.55 | 58.28     |
| 2010 | 3.48   | 1.34   | 0.72  | 1.34 | 78.22     | 6.58 | 2.28   | 1.65  | 2.52 | 54.62     |
| 2011 | 3.40   | 1.40   | 0.70  | 1.23 | 74.37     | 6.56 | 2.47   | 1.62  | 2.36 | 52.36     |
| 2012 | 3.38   | 1.43   | 0.68  | 1.20 | 73.22     | 6.60 | 2.58   | 1.59  | 2.32 | 51.27     |
| 2013 | 3.24   | 1.41   | 0.64  | 1.12 | 74.63     | 6.32 | 2.57   | 1.52  | 2.13 | 52.97     |
| 2014 | 3.16   | 1.37   | 0.63  | 1.10 | 69.68     | 6.23 | 2.54   | 1.51  | 2.09 | 50.68     |
| 2015 | 2.96   | 1.34   | 0.58  | 0.99 | 70.98     | 5.92 | 2.54   | 1.41  | 1.90 | 51.29     |

**Table S6.** Crude rates of ACS and in-hospital mortality per age categories for females and males.

| Age categories | Females           |                       | Males             |                       |
|----------------|-------------------|-----------------------|-------------------|-----------------------|
|                | ACS               | In-hospital mortality | ACS               | In-hospital mortality |
| 18 to < 30     | 1,582 (0.12 %)    | 38 (2.4 %)            | 5,560 (0.23 %)    | 68 (1.22 %)           |
| ≥ 30 to < 40   | 9120 (0.67 %)     | 199 (2.18 %)          | 36,334 (1.49 %)   | 602 (1.66 %)          |
| ≥ 40 to < 50   | 56,136 (4.11 %)   | 1190 (2.12 %)         | 217,533 (8.95 %)  | 4182 (1.92 %)         |
| ≥ 50 to < 60   | 134,515 (9.85 %)  | 3074 (2.29 %)         | 464,968 (19.12 %) | 11,963 (2.57 %)       |
| ≥ 60 to < 70   | 246,496 (18.04 %) | 8459 (3.43 %)         | 608,440 (25.02 %) | 23,889 (3.93 %)       |

---

|              |                   |                  |                   |                  |
|--------------|-------------------|------------------|-------------------|------------------|
| ≥ 70 to < 80 | 454,894 (33.3 %)  | 27,247 (5.99 %)  | 732,886 (30.14 %) | 45,922 (6.27 %)  |
| ≥ 80 to < 85 | 231,320 (16.93 %) | 24,991 (10.8 %)  | 228,421 (9.39 %)  | 23,328 (10.21 %) |
| ≥ 85 to < 90 | 158,252 (11.58 %) | 24,966 (15.78 %) | 105,143 (4.32 %)  | 15,207 (14.46 %) |
| ≥ 90         | 72,653 (5.32 %)   | 17,129 (23.58 %) | 31,768 (1.31 %)   | 7040 (22.16 %)   |

---
